# Supplementary material for: Microbial decontamination and enhanced extraction of value-added compounds from Spirulina platensis using gamma radiation
Source: Research Square preprint supplement (doi:10.21203/rs.3.rs-8148969/v1), 2025-11-28
Supplement: Supplementary file 1 [file ec6a03df4b986c304f36c6fb.docx]

| 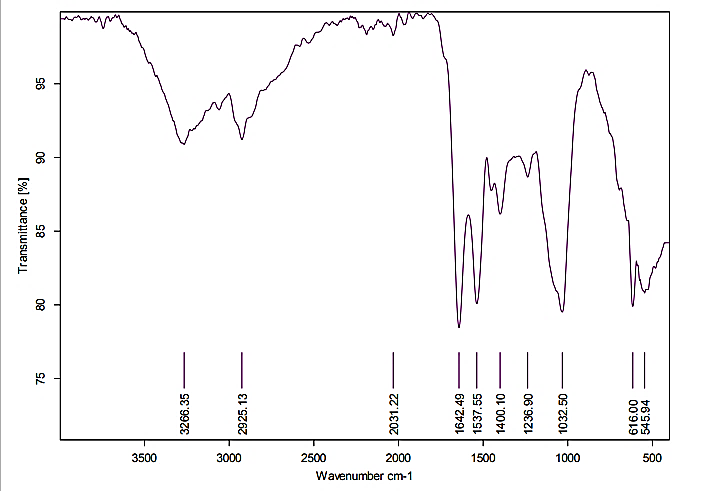**0 kGy** | 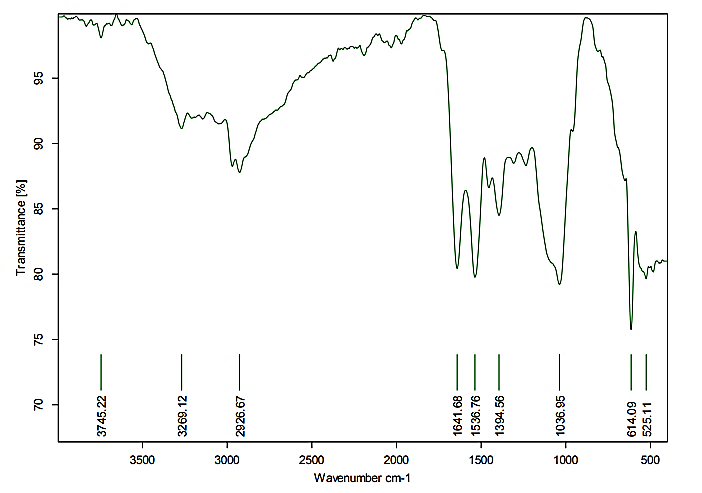  **2 kGy** |
| --- | --- |
| 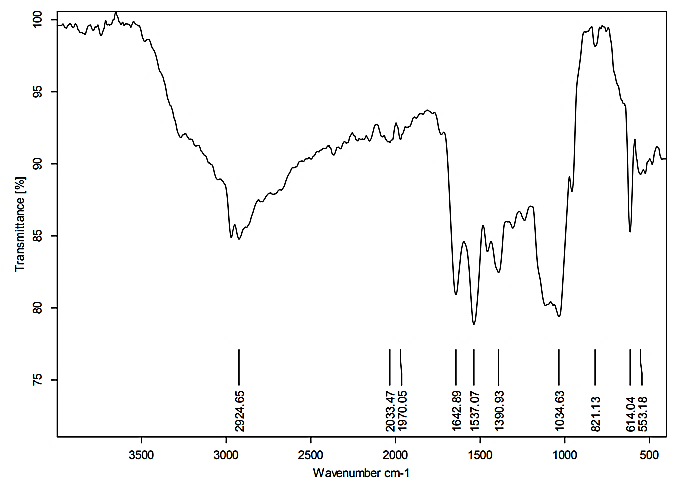  **4 kGy** | 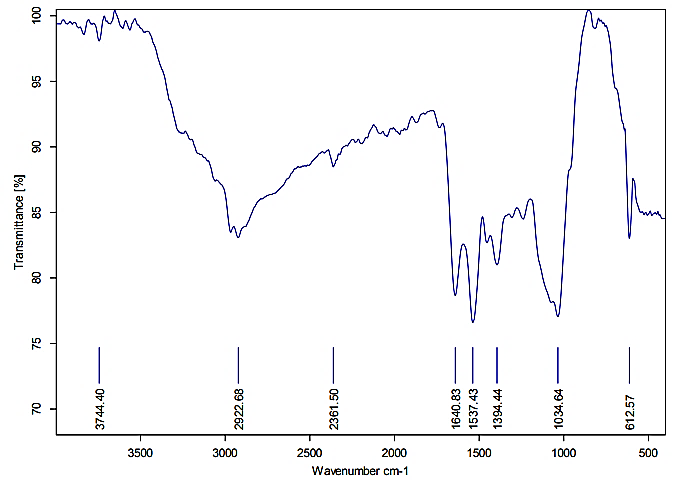  **6 kGy** |
| 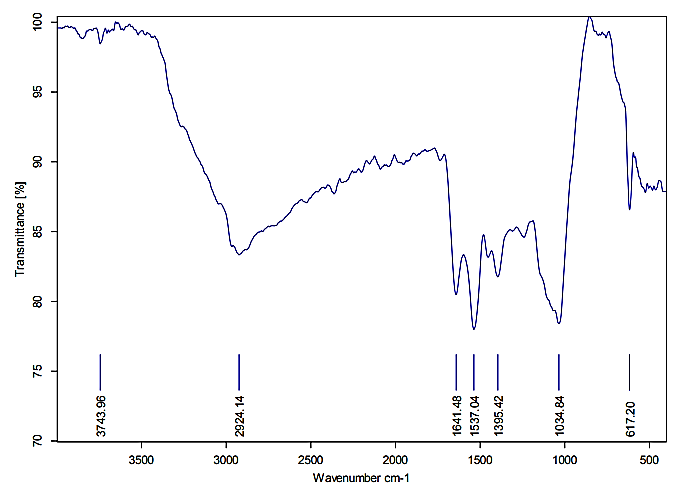  **8 kGy** | 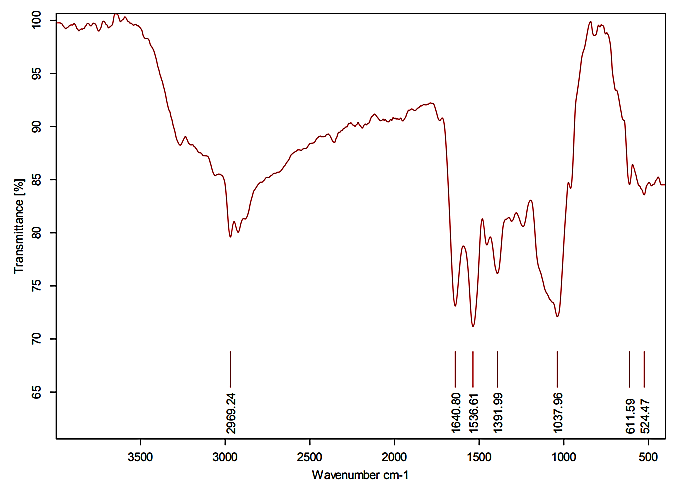  **10 kGy** |

**S 1.**  FTIR spectra of S. platensis powder exposed to different γ-irradiation doses
